1 Less Haste, More Speed: Does delayed blood culture loading lead to adverse incubation time or yield?

2 Gavin Deas,<sup>1</sup> Fergus Hamilton<sup>1,2</sup>, Philip Williams<sup>1</sup>

3

4

5 1. Bristol Royal Infirmary, Marlborough Street, Bristol BS2 8HW

6 2. MRC Integrative Epidemiology Unity, Bristol, BS6 5ES

7

8

9

10

11

12

13

14

15

16 Funding:

17 PW is funded by Medical Research Council grant MR/T005408/1. FH is funded by the NIHR Clinical  
18 Lectureship programme. For the purpose of open access, the author(s) has applied a Creative Commons  
19 Attribution (CC BY) licence to any Author Accepted Manuscript version arising from this submission.

20

21

22 Highlights

- 23 • The UK SMI stipulates blood cultures be loaded within 4 hours of being taken
- 24 • The effect on yield has not been determined for delayed loading
- 25 • We found overall that there was a marginal 0.3% loss of yield per hour delay
- 26 • There was a significant loss of *Streptococcus pyogenes* at 3.2% per hour delay

27

28 Abstract

29 Background

30 Blood culture remains a vital diagnostic tool in the acutely unwell patient. The UK  
31 Standards for Microbiology Investigations (SMI) stipulate pre-analytical requirements  
32 that are aimed at increasing yield and reducing turnaround time. The requirement to  
33 load blood cultures onto incubators within 4 hours has shown to reduce turnaround  
34 time but limited evidence exists as to whether it improves yield.

35 Methods

36 We extracted blood culture results including organism growth, time to detection (TTD),  
37 location and time of sample collection from 4 hospitals in Southwest England. We then  
38 used mixed effects, Bayesian linear and logistic regression models to examine the  
39 effect of predictor variables like time to loading (TTL) on the response variable of growth  
40 or TTD. We used generalised additive models to explore non-linearity.

41 Results

42 449,191 culture sets were analysed, 398,077 of which had enough data to include in the  
43 final analysis. 37,255 sets flagged positive (9.36%) of which 21,330 were considered  
44 pathogens. Our primary analysis identified a small decrease in yield with each hour  
45 delay in loading, OR 0.997 (95% credible interval, CrI 0.994 - 1.001). This effect was  
46 largest in *Streptococcus pneumoniae*, *agalactiae* and *pyogenes*. In our analysis on TTD,  
47 culture sets spend 10.98 (95% CrI 7.8 – 13.2) minutes less incubating for each hour  
48 delay. There was no convincing non-linearity in either of these effects.

49 Conclusion

50 There is a marginal loss of growth for every hour a blood culture is left unincubated,  
51 with the loss of recovery of *Streptococcus pyogenes* and other streptococci most  
52 common. There was no evidence of a reduction in Gram-negatives, anaerobes, or  
53 yeasts. There was a small decrease in TTD for delayed sets. This analysis suggests there  
54 is only marginal benefit in reducing time to load blood cultures on incubators.

55

56

57

58

59

60 Background

61 Blood culture remains a standard and common method for diagnosing bacteraemic  
62 patients and is often used in the setting of the acutely unwell, undifferentiated patient  
63 groups [1]. Although culture remains the gold standard, it is recognised that it is  
64 insensitive, with many patients remaining culture-negative despite clear clinical  
65 evidence of infection [2] [3] [4]. Additionally, due to the requirement for culture and  
66 identification results are often not available to clinicians for more than 24 hours from  
67 sampling. As such, many organisations have set standards for blood culture in an  
68 attempt to increase both the speed of turn around (time to positivity, TTP) and yield of  
69 blood culture [5].

70 In the UK, the Standards for Microbiology Investigation (SMI) for Sepsis and Systemic or  
71 Disseminated Infections includes recommendations to load samples onto an incubator  
72 within 4 hours of collection [6]: the time to load (TTL). This pre-analytical requirement  
73 for TTL goes alongside other requirements on the inoculum size with volume  
74 requirements and bottle numbers to increase the clinical utility of the test [6]. The  
75 evidence supporting the recommendation on TTL includes an effect on total time  
76 between collection and pathogen detection (TTP) [7].

77 Remarkably the effect of reduced TTL on yield is still not clearly understood. It seems  
78 plausible that earlier incubation of blood cultures could improve yield, particularly of  
79 pathogens that are temperature sensitive. However, some evidence supports pre-  
80 incubation as *decreasing* yield, a paradoxical result that has not been widely explored  
81 [8]. Although studies [9] [10] have been performed of in-vitro analysis of spiked blood  
82 cultures, it is not clear that these analyses reflect the reality of clinical microbiological  
83 sampling where microbiological load is often unknown, and patients may have received  
84 antimicrobials or other treatments that might alter microbial growth [11]. As such, we  
85 performed a large (>300,000 blood culture bottles) analysis on the effect of TTL on a)  
86 yield, and b) time to detection.

87

## 88 Methods

### 89 *Setting and study inclusion*

90 This is a retrospective observational analysis of the blood culture pathway in 4  
91 hospitals in the Southwest of England, including 2 district general hospitals and 2  
92 tertiary referral centres. They saw a combined 31,398 patients in March 2024 in their  
93 emergency departments and have an overnight bed base of 2,664 [12]. Each site has  
94 blood culture (BACTEC FX) incubation machines. All blood culture bottles sent to our  
95 laboratory from the 1<sup>st</sup> January 2017 to 30<sup>th</sup> June 2024 were analysed. Culture sets are  
96 taken in line with local antiseptis protocol at clinician's decision. Blood culture sets  
97 were processed in line with UK SMI 12; briefly bottles are loaded continuously onto  
98 automated incubators as soon as they arrived in the laboratory. Fluorescence based  
99 automated alerts indicate a positive result and identification of organisms is provided  
100 through gram stain, antigenic grouping, matrix-assisted laser desorption ionization –  
101 time of flight (MALDI-TOF), and VITEK2 (bioMérieux) automated antimicrobial  
102 susceptibility testing.

### 103 *Clinical data*

104 We collected information on samples received on a) ward and hospital, b) timing of the  
105 blood culture (collection, loading, result, MALDI-TOF result), and c) date. The ICE  
106 (Integrated Clinical Environment™) requesting system was used to establish sample  
107 collection time. The BD BACTEC FX incubator collects loading time (TTL) and time to  
108 detection (TTD) automatically. Duplicate sets of blood cultures were removed, and the  
109 fastest TTD was treated as the TTD. Organisms were classified into pathogenic  
110 organisms or contaminants by the authors, based on whether they pose clinical  
111 significance to patients on a population basis. Although any organism can be  
112 considered pathogenic or a contaminant given the right circumstance, we chose  
113 organisms that pose significant clinical disease, form the mainstay of clinical  
114 microbiological work, and those that the Standards of Microbiological Investigation aim  
115 to target [6]. This list is available in supplementary material 1.

### 116 *Statistical methods*

117 Descriptive statistics of the sources, TTD and TTL, and organism are provided. Naïve  
118 linear and logistic regression analysis, unadjusted and adjusted Bayesian modelling  
119 was performed and generalized additive models are used to fit splines to explore the  
120 presence of non-linearity. One potential problem with analysing time to loading is that  
121 estimates of growth are biased by the physical location of wards and hospitals and  
122 whether samples were taking during laboratory operating hours. A ward that we might

123 expect to have a high positivity rate, for example an intensive care unit, being far from  
124 the laboratory would produce a paradoxical effect of an increased time to loading  
125 correlating with positive culture. To overcome this, we built a mixed effects model that  
126 accounted for ward and site, with wards nested within hospitals. Formally, we allowed  
127 a random intercept for each ward, nested within each hospital, essentially allowing  
128 each ward to have its own baseline positive rate. We then ran logistic regression (for  
129 yield) and linear regression (for TTD), assuming a fixed effect for both (i.e. that the effect  
130 on yield of delay was the same across wards and sites). There are 8 sites: each of the 4  
131 hospitals were divided into emergency departments and inpatient groups, and there  
132 were 107 wards in total. Due to the large number of wards and to allow model fitting, we  
133 used a Bayesian model with weakly informative priors. Statistical analysis was  
134 performed using R 4.2.2 utilising the CRAN package brms [13]. Akaike Information  
135 Criterion values were used to choose optimal model fitting.

136 The logistic/linear regressions models chosen took the form ( $growth \sim TTL + working\ day$   
137  $+ year + (1 | site/ward)$ ) and ( $TTD \sim TTL + working\ day + year + organism + (1 | site/ward)$ ),  
138 where *working day* was a binary variable of the sample being taken between 0900-1700.  
139 This was used on the dataset with all isolates and then subsequently on a subset with  
140 pathogenic isolates only. Pathogen specific analysis for the most common isolates (n >  
141 250) and for anaerobic and fungal growth was also performed. The code is supplied in  
142 Supplementary Material 2.

### 143 *Ethics*

144 All data used in this study was anonymised at source on extraction from the clinical  
145 systems. No patient identifiable information was ever extracted, simply the ward,  
146 location, time of sample, and whether it was positive (including the organism isolated).  
147 As such, ethical approval was not required [14].

148

149

150

151

152

153

154

155

156

157 Results

158 *Descriptive statistics*

159 449,191 sets of blood cultures  
 160 were collected. This averaged out  
 161 at 189.45 sets per day and 71.12  
 162 sets per 1000 bed days. Entries  
 163 with data loss for the loading time,  
 164 time on incubator, organism  
 165 identification, or polymicrobial  
 166 culture samples were removed  
 167 leaving 398,077 sets. 37,255 sets  
 168 flagged positive (9.36%) of which  
 169 21,330 were considered  
 170 pathogenic and 15,925 (4.0%)  
 171 contaminants: with 14,752 of the  
 172 contaminants being coagulase  
 173 negative staphylococci. The  
 174 mean time to loading (TTL) was 4.07 Hours (median 2.92 Hrs; Q1 1.35 Hrs; Q3 5.52 Hrs).  
 175 A density plot of total cultures received is show in Figure 2 broken down by site which  
 176 clearly shows that the TTL was different across differing sites. This data is also shown  
 177 in Table 1, alongside data on the average positivity rate at each site.

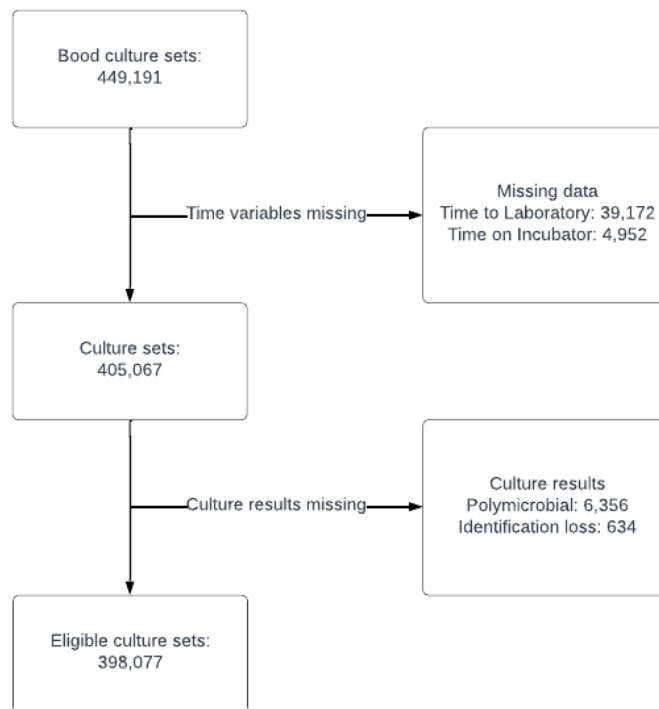

Figure 1 Flow chart of culture set inclusion

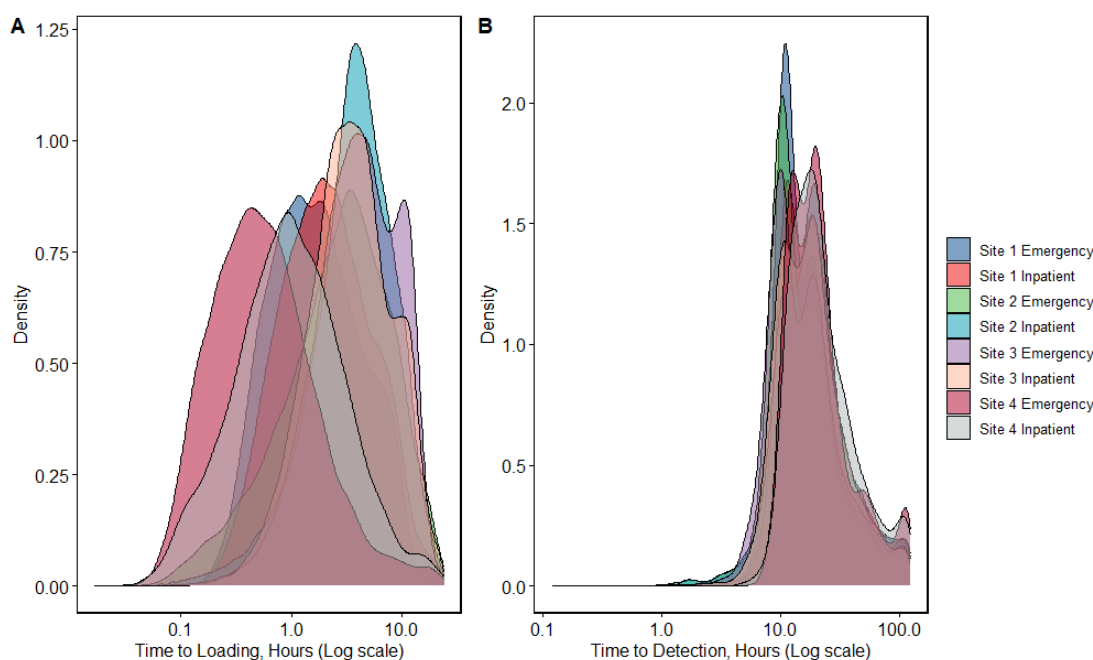

178

Figure 2 A) density plot showing logarithmic distribution of Time to loading per site. B) A density plot showing time to detection per site.

179

180 Table 1 highlights the problem with naïve regression without accounting for ward  
 181 structure. Emergency Departments (ED) have a very high level of positivity, as expected,  
 182 but in one setting (Site 4 Emergency), the mean TTL is extremely low, as the laboratory is  
 183 very closely co-located to this ED. A naïve regression analysis of this site would identify  
 184 this as suggesting a decreased TTL leads to increased yield, but this may just reflect the  
 185 colocation of this laboratory and ED. In contrast, the ED in Site 3 has the highest TTL  
 186 and a very high rate of positivity: a naïve analysis here would identify the opposite  
 187 association here.

188

| Source                      | Mean TTL | Median TTL | SD   | N     | Rate |
|-----------------------------|----------|------------|------|-------|------|
| Site 4 Emergency            | 1.15     | 0.50       | 2.25 | 18185 | 0.13 |
| Site 1 Emergency            | 2.51     | 1.57       | 2.57 | 22784 | 0.15 |
| Site 1 AAU                  | 2.98     | 1.95       | 2.90 | 8752  | 0.08 |
| Site 1 AMU                  | 3.06     | 1.95       | 3.12 | 4881  | 0.08 |
| Site 1 Emergency MIU        | 3.62     | 2.60       | 3.25 | 8871  | 0.09 |
| Site 1 Delivery suit        | 3.83     | 2.77       | 3.23 | 4090  | 0.04 |
| Site 2 Paediatric Emergency | 3.87     | 2.87       | 3.40 | 13640 | 0.08 |
| Site 3 SAU                  | 4.06     | 2.82       | 3.61 | 3546  | 0.08 |
| Site 2 Emergency            | 4.12     | 2.85       | 4.04 | 22152 | 0.13 |
| Site 2 Cardiac ICU          | 4.24     | 3.38       | 3.44 | 5663  | 0.07 |
| Site 1 Nephrology           | 4.32     | 2.85       | 4.09 | 3894  | 0.11 |
| Site 2 Medical ward         | 4.43     | 3.57       | 3.51 | 3668  | 0.08 |
| Site 3 Haematology          | 4.45     | 3.28       | 3.57 | 7063  | 0.1  |
| Site 2 Paediatric oncology  | 4.59     | 3.70       | 3.60 | 5609  | 0.07 |
| Site 3 Paediatric           | 4.77     | 3.45       | 3.83 | 3411  | 0.07 |
| Site 2 Delivery suite       | 4.90     | 4.08       | 3.44 | 5555  | 0.03 |
| Site 2 Neonatal ICU         | 4.98     | 4.14       | 3.45 | 3732  | 0.08 |
| Site 3 Emergency            | 5.10     | 3.88       | 3.89 | 32008 | 0.13 |
| Site 3 MAU                  | 5.11     | 3.80       | 4.05 | 5727  | 0.1  |
| Site 2 Haem/oncology        | 5.32     | 4.18       | 3.81 | 7458  | 0.07 |
| Site 1 ITU                  | 5.59     | 4.63       | 3.99 | 13890 | 0.11 |
| Site 2 Haematology          | 5.66     | 4.45       | 3.90 | 14211 | 0.07 |
| Site 3 ITU                  | 6.05     | 4.83       | 4.25 | 6157  | 0.09 |
| Site 3 Emergency MIU        | 6.55     | 5.35       | 4.41 | 4400  | 0.13 |

189

190 Table 1 Top 25 sources for blood cultures, showing mean, median, standard deviation, 1<sup>st</sup> and 3<sup>rd</sup> quantile for the time to  
 191 loading, number of cultures received and the positivity rate for that site; ordered by TTL.

192



193 *Decreased TTL leads to a marginal increase in yield in both unadjusted regression and*  
194 *in mixed effects models.*

195 In an unadjusted regression model, there was strong evidence of a small effect (OR per  
196 hour, 0.986 95% credible interval, CrI 0.983 – 0.990). This can be interpreted as a 1.4%  
197 decrease in yield for each hour delay. In contrast, our mixed effects model accounting  
198 for site level variation had weaker evidence of an even smaller effect, an OR for growth  
199 of 0.997 (95% CrI 0.994 - 1.001) per hour: e.g. a decrease of around 0.3% per hour.

200 We then performed non-linear modelling to show this and identify if there was a  
201 threshold effect where yield suddenly decreased. The unadjusted model is shown in  
202 Figure 3, and mixed-effect adjusted model in Figure 4. In the unadjusted model, there  
203 was clear evidence of non-linearity and even non-monotonicity with a large decrease in  
204 yield over the period 0-4hrs, but then almost no effect until ~12hrs, with a subsequent  
205 decrease in yield when the TTL increased after 12h. In contrast, when accounting ward  
206 level effects and time in the mixed-effects model, we see no evidence of non-linearity  
207 nor a threshold effect, and the data was consistent with a small, linear effect in  
208 reducing yield. The Akaike Information Criterion (AIC) values were smaller for the model  
209 that accounted for covariates in both the linear and non-linear models,

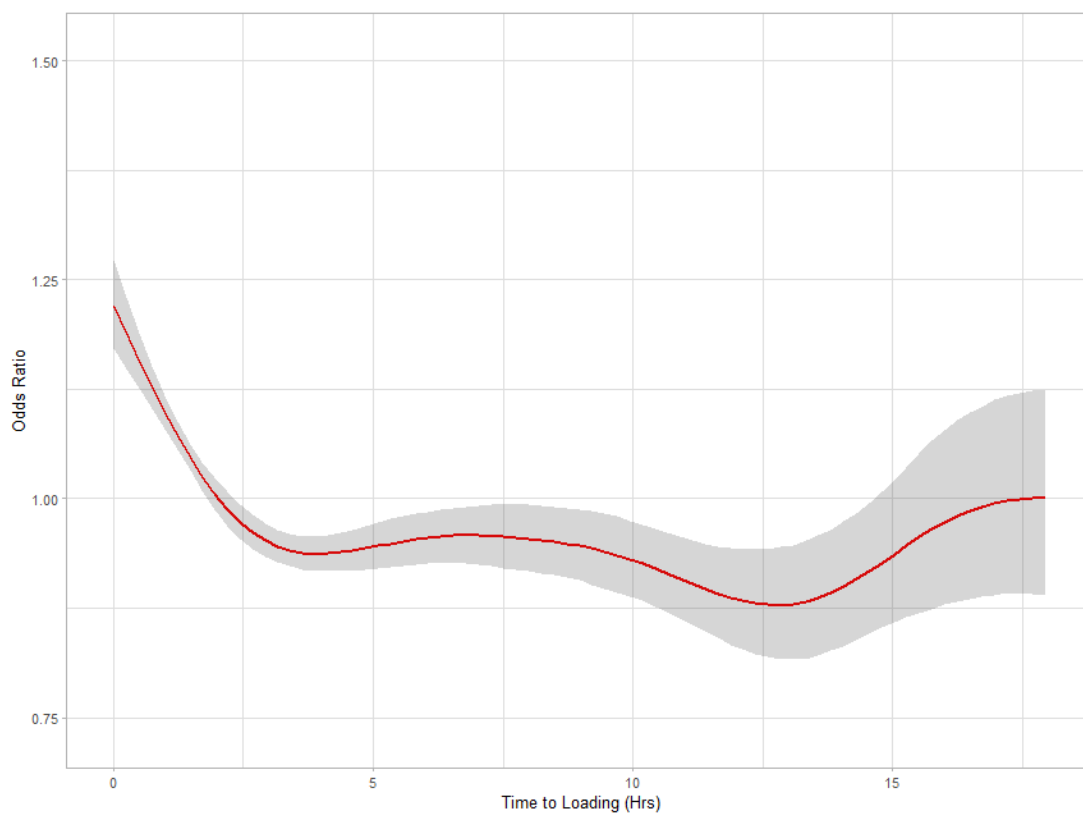

210

211 Figure 3 Generalized additive model plot of estimate against time to loading for growth with 95% credible intervals.

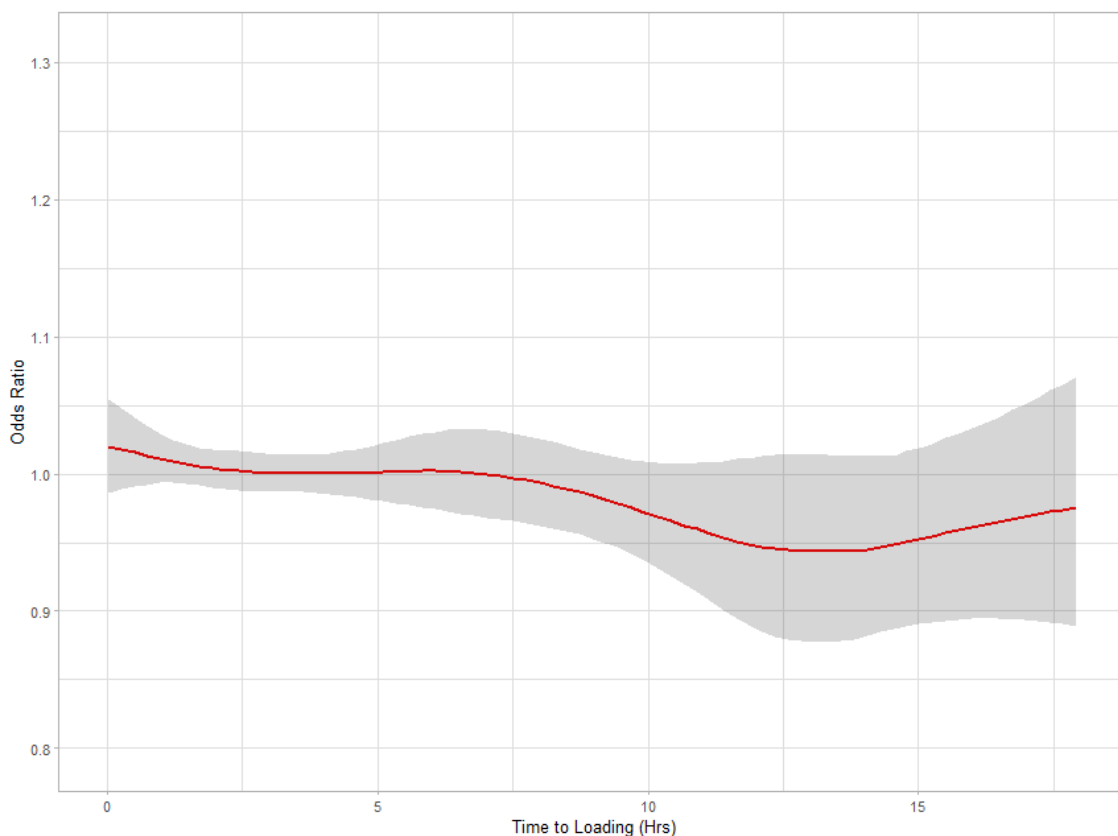

212

213 Figure 3 Generalized additive model plot of estimate against time to loading for growth with 95% credible intervals, adjusted for  
214 location, year, and working day.

215

216 Considering specific groups of pathogens; the adjusted model for yeasts identified no  
217 effect (OR for growth from TTL was 1.01, 95% CrI 0.98 - 1.03), nor for anaerobes (OR  
218 0.98, 95%CrI 0.95 – 1.00).

219 *Loading blood culture bottles quickly leads to proportionately less time on the*  
220 *incubator: reducing overall time to positivity in two ways.*

221 The unadjusted model identified that for every hour loaded earlier, there was an  
222 increase of 0.21 hours (95%CrI 0.16-0.27) of TTD. In the mixed effects model we saw a  
223 similar effect: 0.18 hours (95%CrI 0.13 – 0.24). This suggests that for every hour  
224 increase in time to loading there is 10.98 (95% CrI 7.8 – 13.2) minutes less TTD. As the  
225 total time to positivity is TTL + TTD, this means that some of the benefit of loading earlier  
226 is reduced by longer time to detection, and is consistent with bacterial growth occurring  
227 prior to loading, whilst in the culture set is in transit, but at a reduced rate. We did not  
228 identify any evidence of non-linearity, as expected.

229

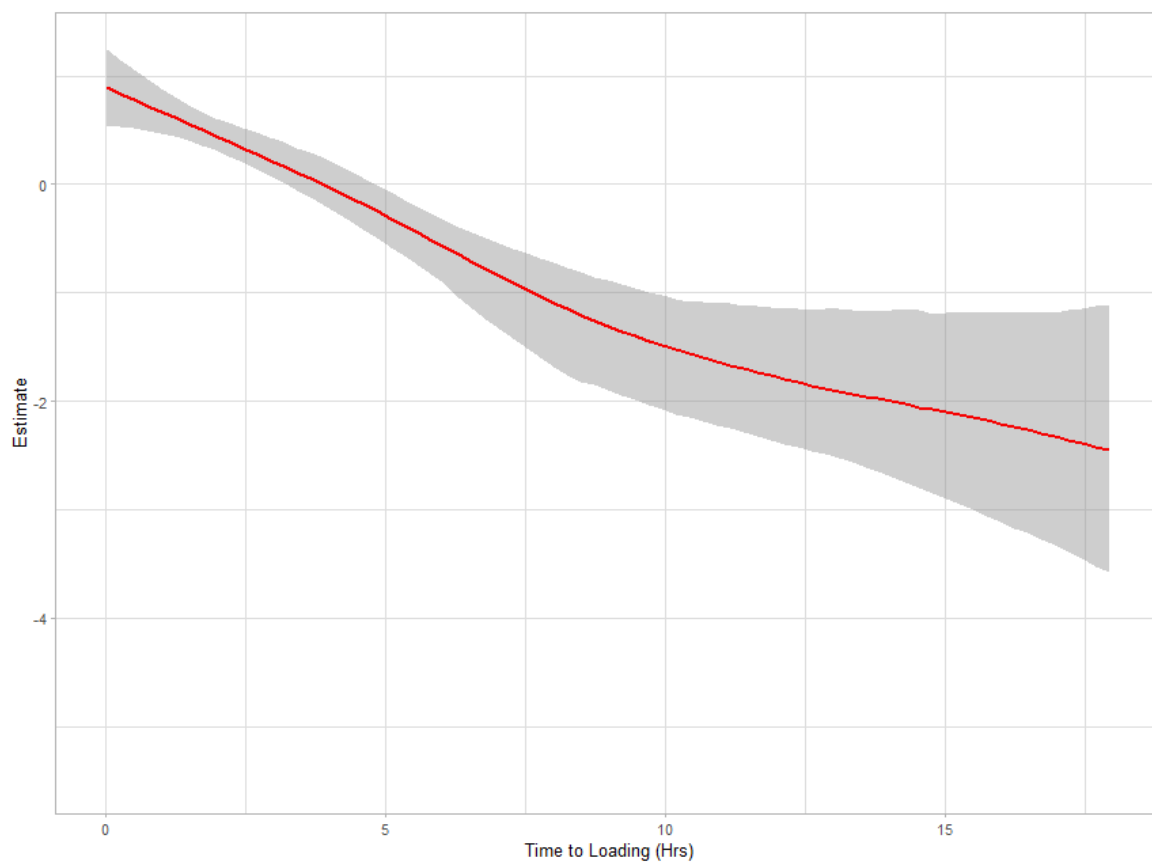

230

231 Figure 4 Generalized additive model of time to loading on time to detection with 95% credible intervals, without adjustment.

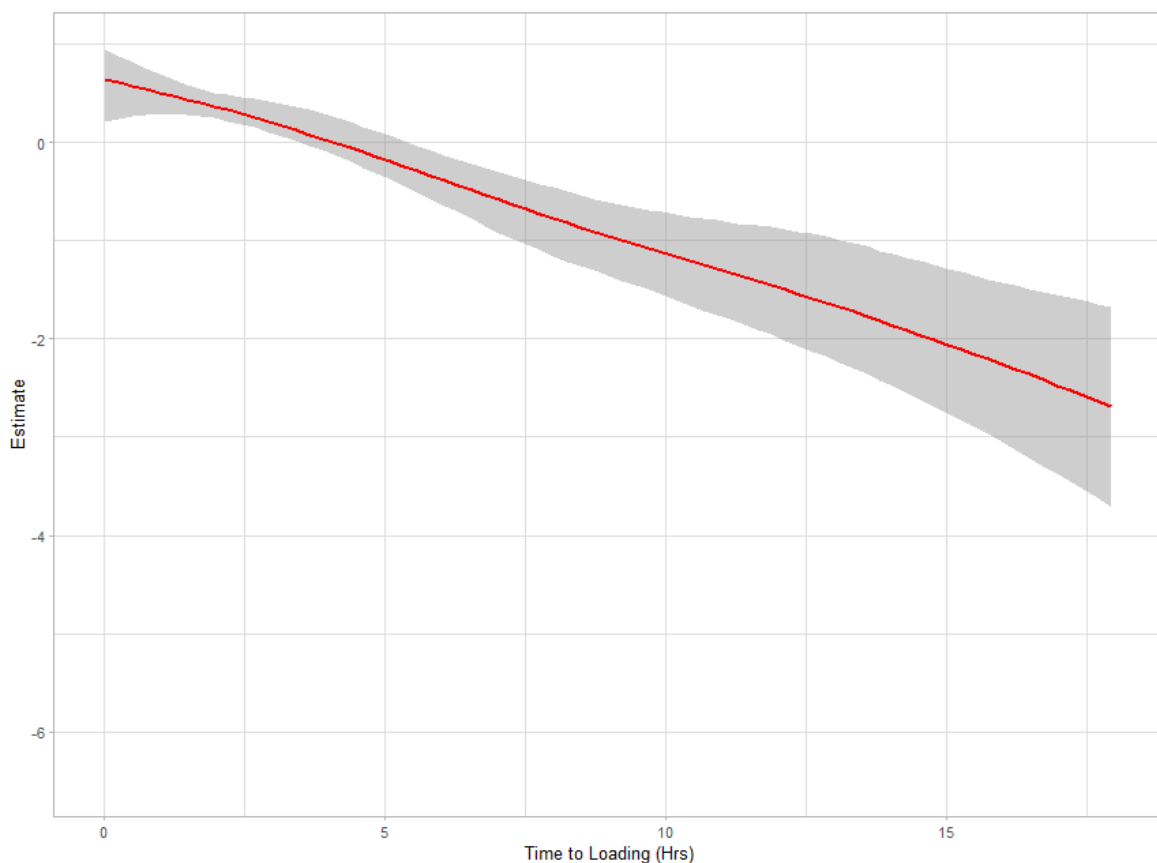

232

233 Figure 5 Generalized additive model of time to loading on time to detection with 95% credible intervals adjusted for location,  
 234 working day, organism and year.

235 *The effect on yield is dependent on the species of microorganisms: with a large effect*  
 236 *on Streptococci including S. pyogenes*

237 It is well established that different organisms have differing growth rates in culture, and  
 238 it may be that the effect of delayed loading on yield is species specific. Table 2 shows  
 239 the list of isolates with greater than 250 occurrences with the mean time to loading and  
 240 time to detection, exclusive of contaminants. *Escherichia coli* was the most common  
 241 pathogen.

| Organism                                 | Mean TTL | Mean TTD | SD TTL | N    |
|------------------------------------------|----------|----------|--------|------|
| <b><i>Streptococcus pneumoniae</i></b>   | 2.85     | 11.75    | 2.52   | 760  |
| <b><i>Streptococcus pyogenes</i></b>     | 2.88     | 11.24    | 2.72   | 352  |
| <b><i>Streptococcus dysgalactiae</i></b> | 2.97     | 10.78    | 2.96   | 457  |
| <b><i>Streptococcus agalactiae</i></b>   | 3.31     | 10.49    | 2.83   | 469  |
| <b><i>Escherichia coli</i></b>           | 3.34     | 13.93    | 2.84   | 6261 |
| <b><i>Staphylococcus aureus</i></b>      | 3.34     | 19.93    | 2.70   | 3526 |
| <b><i>Proteus mirabilis</i></b>          | 3.37     | 17.66    | 2.87   | 423  |
| <b><i>Serratia marcescens</i></b>        | 3.38     | 17.72    | 2.69   | 267  |
| <b><i>Pseudomonas aeruginosa</i></b>     | 3.44     | 21.07    | 2.82   | 678  |
| <b><i>Enterococcus faecalis</i></b>      | 3.45     | 16.35    | 2.84   | 532  |
| <b><i>Klebsiella oxytoca</i></b>         | 3.53     | 15.54    | 2.78   | 304  |

|                                     |      |       |      |      |
|-------------------------------------|------|-------|------|------|
| <i>Klebsiella pneumoniae</i>        | 3.55 | 15.29 | 2.85 | 1107 |
| <i>Enterococcus faecium</i>         | 3.61 | 16.50 | 2.79 | 655  |
| <i>Enterobacter cloacae complex</i> | 3.79 | 14.62 | 2.79 | 440  |
| <i>Streptococcus mitis/oralis</i>   | 3.87 | 15.77 | 2.97 | 283  |
| <i>Enterobacterales</i>             | 4.11 | 14.21 | 2.81 | 317  |

242

243 Table 2 Table of the isolates occurring more than 250 times, exclusive of contaminants, with mean TTL, median TTL and  
244 number of isolates; ordered by ascending mean TTL.

245 As we know that at the organism is unknown at the time of the blood culture being  
246 taken, and that the laboratory management of blood cultures is generally independent  
247 of the clinical management, so we should expect the time to loading to be broadly  
248 similar for each species. However, Table 2 demonstrates subtle differences in mean  
249 TTL, *Streptococcus pneumoniae*, *dysgalactiea* and *pyogenes* have the quickest mean  
250 TTL.

251 As this difference is not due to earlier loading, this is likely due to decreased yield with  
252 longer TTL in some species. For example, if a species cannot survive for more than 8hrs  
253 in a culture set before being loaded, then we will only get positive results for this  
254 species when the TTL is < 8hrs, lowering the mean TTL. We therefore repeated our  
255 above analysis focusing on each pathogen using the same approach for these common  
256 pathogens.

257 Figure 8 shows a forest plot with 95% credible intervals for the most common isolates  
258 and their odds ratio of growth from the TTL. The organisms showed the strongest effect  
259 for TTL reducing yield were *Streptococcus pneumonia*, *agalactiea* and *pyogenes*.

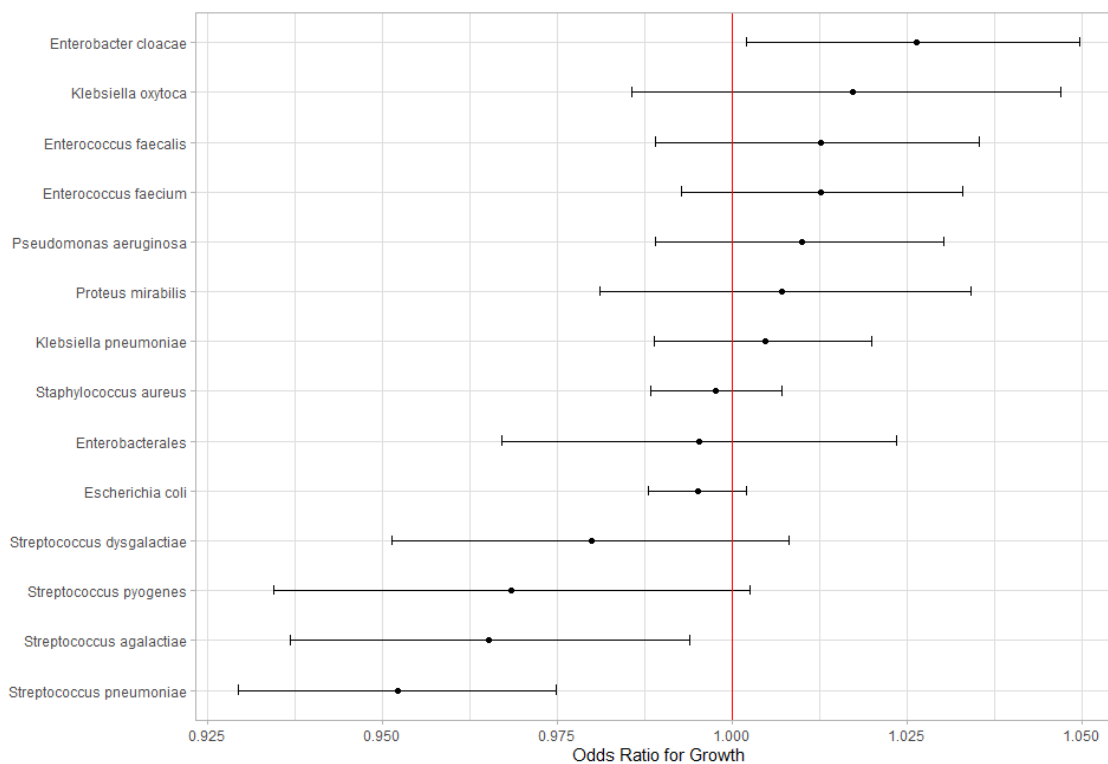

260

261 **Figure 7** Forest plot for the estimate of growth per organism, adjusted for location, working day and year.

262 The beta haemolytic *streptococci* appear to be significantly affected by delays in

263 loading, an odds ratio for *Streptococcus pyogenes* of 0.97 (95%CrI 0.93 – 1.0 per hour

264 delay. This means that delaying loading *S. pyogenes* by 4 hours might lead to a loss of

265 11.4% of yield. *Streptococcus pneumoniae* may be explained by the known phenomena  
266 of autolysis [15].

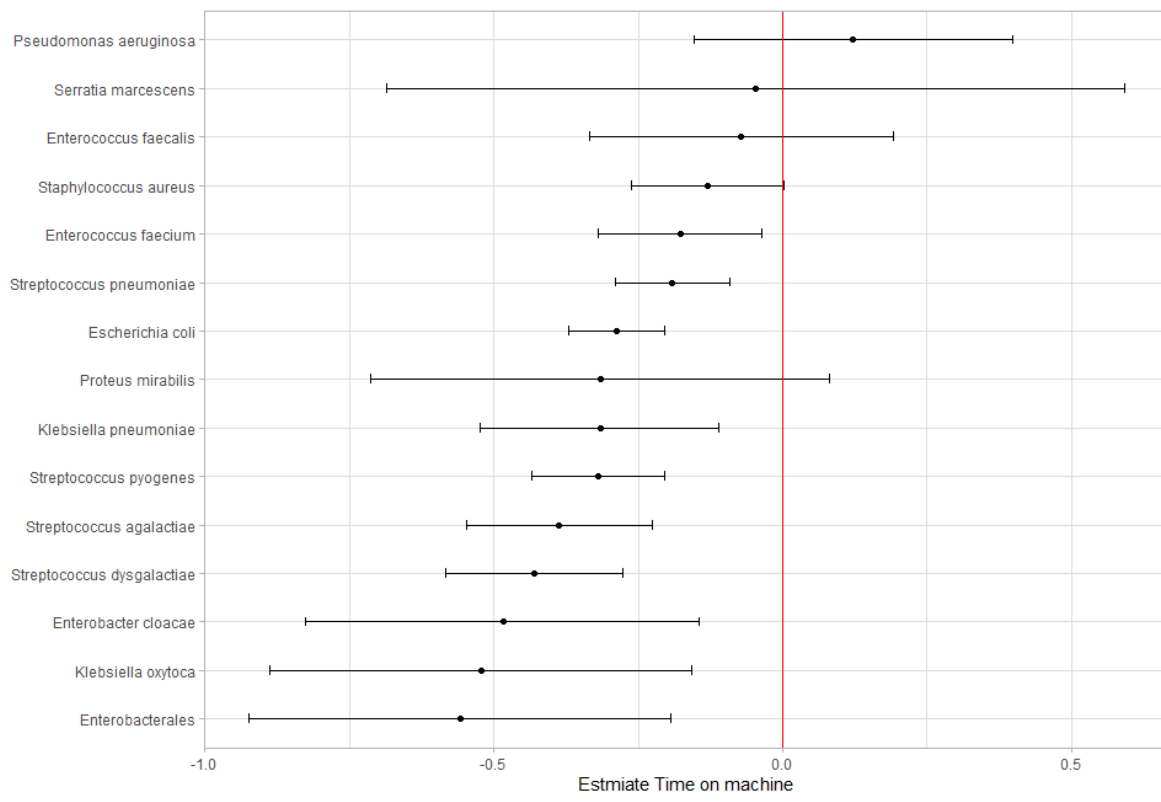

267  
268 **Figure 9 Forest plot of estimate on species time to detection from TTL**  
269 Figure 9 shows the relationship between the estimates on TTD and mean TTL for each  
270 organism listed in Table 2. Unsurprisingly, most isolates have figures below 0, meaning  
271 TTD is reduced for each hour they are delayed in getting to the laboratory, with the  
272 largest effects for the other *Enterobacteriales* species and the beta haemolytic  
273 *Streptococci*. For all species, estimates were larger than 1: the bacterial growth before  
274 loading was never fast enough to mean that delayed loading had no effect on the overall  
275 time to positivity.

276

277 Discussion

278 This analysis of blood culture loading showed that a longer time to loading (TTL) was  
279 associated with a minimally lower rate of positivity, with an OR of 0.997 (95%CrI 0.994 -  
280 1.001) for each hour. This was largely driven by loss of beta and alpha haemolytic  
281 *Streptococci*. The unique feature of *S pneumoniae* exhibiting autolysis may explain [15]  
282 its estimate and loss of growth within delayed blood culture bottles. The loss of *S*  
283 *pyogenes* is of both clinical and public health concern, a loss of up to 11.4% if cultures  
284 arrive in the laboratory at 4 hours from sampling. Invasive *S pyogenes* is a severe  
285 infection and can lead to seeding to distant sites, requiring prolonged antibiotics and  
286 multiple surgical interventions. Correctly diagnosing *Streptococcal* bacteraemia would  
287 reduce broad spectrum antimicrobial use, increase public health intervention and  
288 prevention, as well as improving diagnostic stewardship. In this the overall effect of  
289 earlier loading was small, suggesting that marginal benefit in overall yield would be  
290 expected by reducing the time to load. Whether the effect on delayed transport to the  
291 laboratory on yield is worth investing in infrastructure to reduce is debatable; it is well  
292 known that other factors have effects on yield that are far greater than that described  
293 here, principally blood volume [16].

294 *Comparisons with previous literature*

295 Venturelli et al published an observational study on time to loading and positivity rates  
296 in 2017. They report the results of 50,955 culture results and found a similar effect (OR  
297 of 0.997, 95%CI:0.994-0.999) for growth for each hour in delay which matches our main  
298 result. However, they did not detect differences in sub-analysis of pathogens. Their  
299 laboratory only accepted culture sets in working hours but otherwise worked similarly  
300 our own laboratory [17]. A similar analysis from Canada noted that *Streptococcal*  
301 *species* were not recovered from blood cultures at the most distant sites, which had  
302 higher TTL. They found a similar OR for growth of 0.998 (95%CI 0.994 – 1.003) in logistic  
303 regression analysis [18].

304 Conversely, an interventional study of ICU patients' blood culture sampling showed an  
305 increase in yield with increasing delay, 20.7% off site vs. 14.2% on site,  $p < 0.001$  [19].  
306 Their study had significantly fewer sets analysed at only 250 in each arm. Invitro studies  
307 have shown that time to loading at less than 24 hours has no decrease in yield, and that  
308 pre-loading temperature control at room temperature is also of no consequence [20].  
309 Taken together these would suggest that there is, at best, a marginal improvement in  
310 yield with decreasing TTL.

311 The effect of TTL on time to positivity and TTD suggest that cultures spent less time on  
312 the incubators if they were loaded with a longer delay with a negative coefficient of –



313 0.18, around 11 minutes quicker per hour delay. This is different to previous  
314 publications and the sources cited for the UK SMI where a coefficient of greater than 0  
315 is described, suggesting that for every hour delay there is an increased TTD [21] [22].  
316 This could be explained by the relatively short delay times here compared to the other  
317 studies, which looked at a difference of 12 hours or more between groups; or that the  
318 bottles here are subject to low level incubation whilst on the wards in our group that  
319 was not the case in the published groups, a factor that cannot be accounted for.

#### 320 *Strengths and limitations*

321 The strength of this model is that it accounts for different patient populations within the  
322 hospital by nesting wards within hospital sites in the multilevel Bayesian model, in this  
323 way we also account for the effect of baseline positivity areas being different distances  
324 to the laboratory, adjustment in this manner means that OR for growth dramatically  
325 falls to very little compared to the unadjusted analysis. One unaccounted for factor is  
326 that blood cultures are an imperfect test, and it is assumed in clinical practice that  
327 even negative blood cultures in an antibiotic naive patient may harbour pathogens. This  
328 means that we have no objective measurement for the presence of growth when  
329 looking at the various predictor variables, and as such the forest plots showing the  
330 estimate of growth from time to loading for the most common pathogens is relative to  
331 each other and not to an objective reference organism. This as an observational study  
332 and although we cannot rule out differences in loading time and practices that might  
333 affect yield, we cannot prove it.

334

335

336

337

338

339

340

341

342

343

344

345 Conclusion

346 This analysis found that time to loading was independently and negatively correlated  
347 with a loss of yield at around 0.3% per hour, with a significant loss in some  
348 *Streptococci*. However, there is no clear evidence that this pre-analytic requirement  
349 affects yield for other pathogens.

350

351

352

353

354

355

356

357

358

359

360

361

362

363

364

365

366

367

368

369

370

371

372

373

374

375 References

376

- [1] MD, MSc1,2 Manu Shankar-Hari, MAS3 Gary S. Phillips, MD4 Mitchell L. Levy, and et al, "Developing a New Definition and Assessing New Clinical Criteria for Septic Shock," *JAMA*, pp. doi:10.1001/jama.2016.0289, 2016.
- [2] Li X, Mei A, Li P, Liu Y, Li X, Li W, Wang C, Xie S. Duan H, "The diagnostic value of metagenomic next-generation sequencing in infectious diseases.," *BMC Infect Dis.*, pp. doi: 10.1186/s12879-020-05746-5., 2021 Jan.
- [3] de Vries CR, Ruffin F, Sharma-Kuinkel B, Park L, Hong D, Scott ER, Blair L, Degner N, Hollemon DH, Blauwkamp TA, Ho C, Seng H, Shah P, Wanda L, Fowler VG, Ahmed AA. Eichenberger EM, "Microbial Cell-Free DNA Identifies Etiology of Bloodstream Infections, Persists Longer Than Conventional Blood Cultures, and Its Duration of Detection Is Associated With Metastatic Infection in Patients With Staphylococcus aureus and Gram-Negative Bactere," *Clin Infect Dis.*, pp. doi: 10.1093/cid/ciab742., 2022 Jun.
- [4] Jewell E, Maile MD, Cinti SK, Bateman BT, Engoren M. Sigakis MJG, "Culture-Negative and Culture-Positive Sepsis: A Comparison of Characteristics and Outcomes.," *Anesth Analg*, pp. doi: 10.1213/ANE.0000000000004072., 2019 Nov.
- [5] NHEngland. (2023, March) A national review of blood culture pathway processes to support better antimicrobial stewardship and improved patient safety. [Online]. <https://www.england.nhs.uk/wp-content/uploads/2022/06/B0686-improving-the-blood-culture-pathway-executive-summary-v1-1.pdf.pdf>
- [6] UKHSA Standards Unit Specialised Microbiology and Laboratories. (2024) UK SMI S 12 Sepsis and systemic or disseminated. [Online]. <https://www.rcpath.org/static/3f51b8e5-1ebe-469d-a79f3a3323bfaec9/7e38a3d1-fdc7-4c6e-aadc7e55b698ef26/uk-smi-s-12i1-sepsis-and-systemic-or-disseminated-infection-january-2023-pdf.pdf>
- [7] Caroline Rönnerberg , Masako Mildh, Måns Ullberg, and Volkan Ozenci, "Transport time for blood culture bottles: underlying factors and its consequences," *Diagn Microbiol Infect Dis*, pp. doi: 10.1016/j.diagmicrobio.2013.03.031., 2013.
- [8] Holt HM, Petersen IS, Østergaard C, Bruun B. Lemming L, "Bactec 9240 blood culture system: to preincubate at 35 degrees C or not?," *Clin Microbiol Infect.*, pp. doi: 10.1111/j.1469-0691.2004.00969.x, 2004 Dec.
- [9] Roberts T, Soeng S, Cusack TP, Dance DAB, Lee SJ, Reed TAN, Hinfonthong P, Sihalath S, Sengduangphachanh A, Watthanaworawit W, Wangrangsimakul T, Newton PN, Nosten FH, Turner P, Ashley EA Ling CL, "Impact of delays to incubation and storage temperature on blood culture results: a multi-centre study," *BMC Infect Dis.*, pp. doi: 10.1186/s12879-021-05872-8, 2021 Feb.

- [10] Bills AR, Lang DL, Ruschell G, Heiter BJ, Bourbeau PP, Sautter RL, "Effects of delayed-entry conditions on the recovery and detection of microorganisms from BacT/ALERT and BACTEC blood culture bottles.," *J Clin Microbiol.*, pp. doi: 10.1128/JCM.44.4.1245-1249.2006., 2006 Apr.
- [11] Li C, Rosener B, Mitchell A, Noto Guillen M, "Antibacterial activity of nonantibiotics is orthogonal to standard antibiotics," *Science*, pp. doi: 10.1126/science.adk7368. , 2024 Apr.
- [12] NHSEngland. (2024, March) A&E Attendances and Emergency Admissions 2023-24. [Online]. <https://www.england.nhs.uk/statistics/statistical-work-areas/ae-waiting-times-and-activity/ae-attendances-and-emergency-admissions-2023-24/>
- [13] PC, Bürkner, "brms: An R Package for Bayesian Multilevel Models using Stan," *Journal of Statistical Software*, p. doi.org/10.18637/jss.v080.i01, 2017.
- [14] NHS Health Research Authority. (2024) HRA decision tool. [Online]. <https://www.hra-decisiontools.org.uk/ethics/EngresultN1.html>
- [15] P García, M Paz González, E García, JL García, and R Lopez, "The molecular characterization of the first autolytic lysozyme of *Streptococcus pneumoniae* reveals evolutionary mobile domains," *Mol Microbiol*, pp. doi: 10.1046/j.1365-2958.1999.01455.x, 1999.
- [16] M Rele , D Cowley, JP Buttery, N Curtis, and TG Connell, "How reliable is a negative blood culture result? Volume of blood submitted for culture in routine practice in a children's hospital," *Pediatrics*, pp. 119:891-6., 2007.
- [17] Righi E, Borsari L, Aggazzotti G, Busani S, Mussini C, Rumpianesi F, Rossolini GM, Girardis M. Venturelli C, "Impact of Pre-Analytical Time on the Recovery of Pathogens from Blood Cultures: Results from a Large Retrospective Survey," *PLoS One*, pp. doi: 10.1371/journal.pone.0169466., 2017 Jan.
- [18] Rafipour D, Gorn I, Sabri E, Sant N, Desjardins M. Deslandes V, "Effect of delayed entry of blood culture bottles in BACTEC automated blood culture system in the context of laboratory consolidation.," *Sci Rep.*, pp. doi: 10.1038/s41598-022-05246-3., 2022 Jan.
- [19] Kuhn SO, Vollmer M, Scheer C, Fuchs C, Rehberg S, Balau V, Hahnenkamp K, Bohnert JA, Gründling M. Schwarzenbacher J, "On-site blood culture incubation shortens the time to knowledge of positivity and microbiological results in septic patients.," *PLoS One.*, pp. doi: 10.1371/journal.pone.0225999., 2019 Dec.
- [20] Roberts T, Soeng S, Cusack TP, Dance DAB, Lee SJ, Reed TAN, Hinfonthong P, Sihalath S, Sengduangphachanh A, Watthanaworawit W, Wangrangsimakul T, Newton PN, Nosten FH, Turner P, Ashley EA. Ling CL, "Impact of delays to incubation and storage temperature on blood culture results: a multi-centre study.," *BMC Infect Dis.* , pp. doi: 10.1186/s12879-021-05872-8., 2021 Feb.

- [21] Yan JJ, Chien ML, Chen HM, Wu HM, Wu JJ, Janapatla RP, "Effect of overnight storage of blood culture bottles on bacterial detection time in the BACTEC 9240 blood culture system.," *J Microbiol Immunol Infect.*, pp. doi: 10.1016/S1684-1182(10), 2010 Apr.
- [22] Inuma Y, Takakura S, Nagao M, Matsushima A, Shirano M, Ichiyama S, Saito T, "Delayed insertion of blood culture bottles into automated continuously monitoring blood culture systems increases the time from blood sample collection to the detection of microorganisms in bacteremic patients.," *J Infect Chemother.* , pp. doi: 10.1007/s10156-008-0664-6, 2009 Feb.
- [23] H M Holt, I S Petersen, C Østergaard, B Bruun L Lemming 1, "Bactec 9240 blood culture system: to preincubate at 35 degrees C or not?," *Clin Microbiol Infect*, pp. DOI: 10.1111/j.1469-0691.2004.00969.x, 2004.
- [24] An Im De Sutter, Natalija Keber, Hilde Habraken, Thierry Christiaens Mieke L van Driel 1, "Different antibiotic treatments for group A streptococcal pharyngitis," *Cochrane Database Syst Rev*, pp. doi: 10.1002/14651858.CD004406.pub2., 2010.
- [25] van der Bij AK, Goessens W, Verbrugh HA, Vos MC, Kerremans JJ, "Immediate incubation of blood cultures outside routine laboratory hours of operation accelerates antibiotic switching.," *J Clin Microbiol.* , pp. doi: 10.1128/JCM.01092-09, 2009 Nov.
- [26] Lieven van der Velden, Fidel Vos, Johan Mouton, and P Sturm, "Clinical impact of preincubation of blood cultures at 37°C," *J Clin Microbiol*, pp. doi: 10.1128/JCM.00552-10, 2011.
- [27] Takashi Saito et al., "Delayed insertion of blood culture bottles into automated continuously monitoring blood culture systems increases the time from blood sample collection to the detection of microorganisms in bacteremic patients," *J Infect Chemother*, pp. doi: 10.1007/s10156-008-0664-6., 2009.
