# Supplementary material for: Less Haste, More Speed: Does delayed blood culture loading lead to adverse incubation time or yield?
Source: bioRxiv or medRxiv preprint supplement (doi:10.1101/2024.10.15.24315399), 2024-10-16
Supplement: Supplementary file [file media-1.pdf]

1 Supplementary material 2

2

```
3 m1 <- brm(growth ~ time_to_load,
4   data = d_no_contams,
5   warmup = 1000,
6   iter = 2000,
7   chains = 4,
8   cores = 4,
9   threads = threading(4),
10  family = bernoulli(link = "logit"),
11  backend = "cmdstanr",
12  stan_model_args = list(stanc_options = list("O1")))
13
14 m2 <- brm(growth ~ time_to_load + working_day + year + (1 | site/ward),
15  data = d_no_contams,
16  warmup = 1000,
17  iter = 2000,
18  chains = 4,
19  cores = 4,
20  threads = threading(4),
21  family = bernoulli(link = "logit"),
22  backend = "cmdstanr",
23  stan_model_args = list(stanc_options = list("O1")))
24
25 m3 <- brm(growth ~ s(time_to_load),
26  data = d_no_contams,
27  warmup = 1000,
28  iter = 2000,
29  chains = 4,
30  cores = 4,
31  threads = threading(4),
32  family = bernoulli(link = "logit"),
33  backend = "cmdstanr",
34  stan_model_args = list(stanc_options = list("O1")))
35
36 m4 <- brm(growth ~ s(time_to_load) + working_day + year + (1 | site/ward),
37  data = d_no_contams,
38  warmup = 1000,
39  iter = 2000,
40  chains = 4,
41  cores = 4,
42  threads = threading(4),
43  family = bernoulli(link = "logit"),
44  backend = "cmdstanr",
45  stan_model_args = list(stanc_options = list("O1")))
46
47 m5 <- brm(time_on_machine ~ time_to_load,
48  data = d_only_pos,
49  warmup = 1000,
50  iter = 2000,
51  chains = 4,
52  cores = 4,
```

```

53     threads = threading(4),
54     family = gaussian(),
55     backend = "cmdstanr",
56     stan_model_args = list(stanc_options = list("O1")))
57
58 m6 <- brm(time_on_machine ~ time_to_load + working_day + organism + (1 | site/ward),
59     data = d_only_pos,
60     warmup = 1000,
61     iter = 2000,
62     chains = 4,
63     cores = 4,
64     threads = threading(4),
65     family = gaussian(),
66     backend = "cmdstanr",
67     stan_model_args = list(stanc_options = list("O1")))
68
69 m7 <- brm(time_on_machine ~ s(time_to_load),
70     data = d_only_pos,
71     warmup = 1000,
72     iter = 2000,
73     chains = 4,
74     cores = 4,
75     threads = threading(4),
76     family = gaussian(),
77     backend = "cmdstanr",
78     stan_model_args = list(stanc_options = list("O1")))
79
80 m8 <- brm(time_on_machine ~ s(time_to_load) + working_day + organism + (1 | site/ward),
81     data = d_only_pos,
82     warmup = 1000,
83     iter = 2000,
84     chains = 4,
85     cores = 4,
86     threads = threading(4),
87     family = gaussian(),
88     backend = "cmdstanr",
89     stan_model_args = list(stanc_options = list("O1")))
90
91 list <- d_no_contams |>
92   count(organism, sort = T) |>
93   filter(n > 300) |>
94   pull(organism)
95
96 model_function <- function(organism_name) {
97
98   d_working <- d_no_contams |>
99     filter(organism == organism_name | is.na(organism))
100
101   m_growth <- brm(growth ~ time_to_load + working_day + year + (1 | site/ward),
102     data = d_working,
103     warmup = 1000,
104     iter = 2000,
105     chains = 4,
106     cores = 4,

```

```
107     threads = threading(4),
108     family = bernoulli(link = "logit"),
109     backend = "cmdstanr",
110     stan_model_args = list(stanc_options = list("O1"))
111 }
112 map(list, model_function)
113
```
