# Supplementary material for: Less Haste, More Speed: Does delayed blood culture loading lead to adverse incubation time or yield?
Source: bioRxiv or medRxiv preprint supplement (doi:10.1101/2024.10.15.24315399), 2024-10-16
Supplement: Supplementary file [file media-2.pdf]

- 1 Supplementary material 1
- 2 List of organisms considered pathogenic:
- 3 Enterobacterales
- 4 Pseudomonadales
- 5 Enterococcus
- 6 Staphylococcus aureus
- 7 Streptococcus pneumoniae
- 8 Beta-hemolytic streptococcus
- 9 Streptococcus anginosus
- 10 Streptococcus galloyticus
- 11 Haemophilus influenzae
- 12 Haemophilus parainfluenzae
- 13 Streptococcus constellatus
- 14 Stenotrophomonas maltophilia
- 15 Streptococcus intermedius
- 16 Neisseria meningitidis
- 17 Corynebacterium striatum
- 18 Aerococcus urinae
- 19 Pasteurella multocida
- 20 Finegoldia magna
